# Supplementary material for: Identification and Functional Verification of CITED2 Gene Promoter Region in Patients with Patent Ductus Arteriosus
Source: MDPI journal article supplement (doi:10.3390/ijms242216204), 2023-11-11
Supplement: s1 [file s1]

**Figure S1 Original image of electrophoretic migration analysis experiment.**  
**Correspond to V1-V7 in Figure 4A**

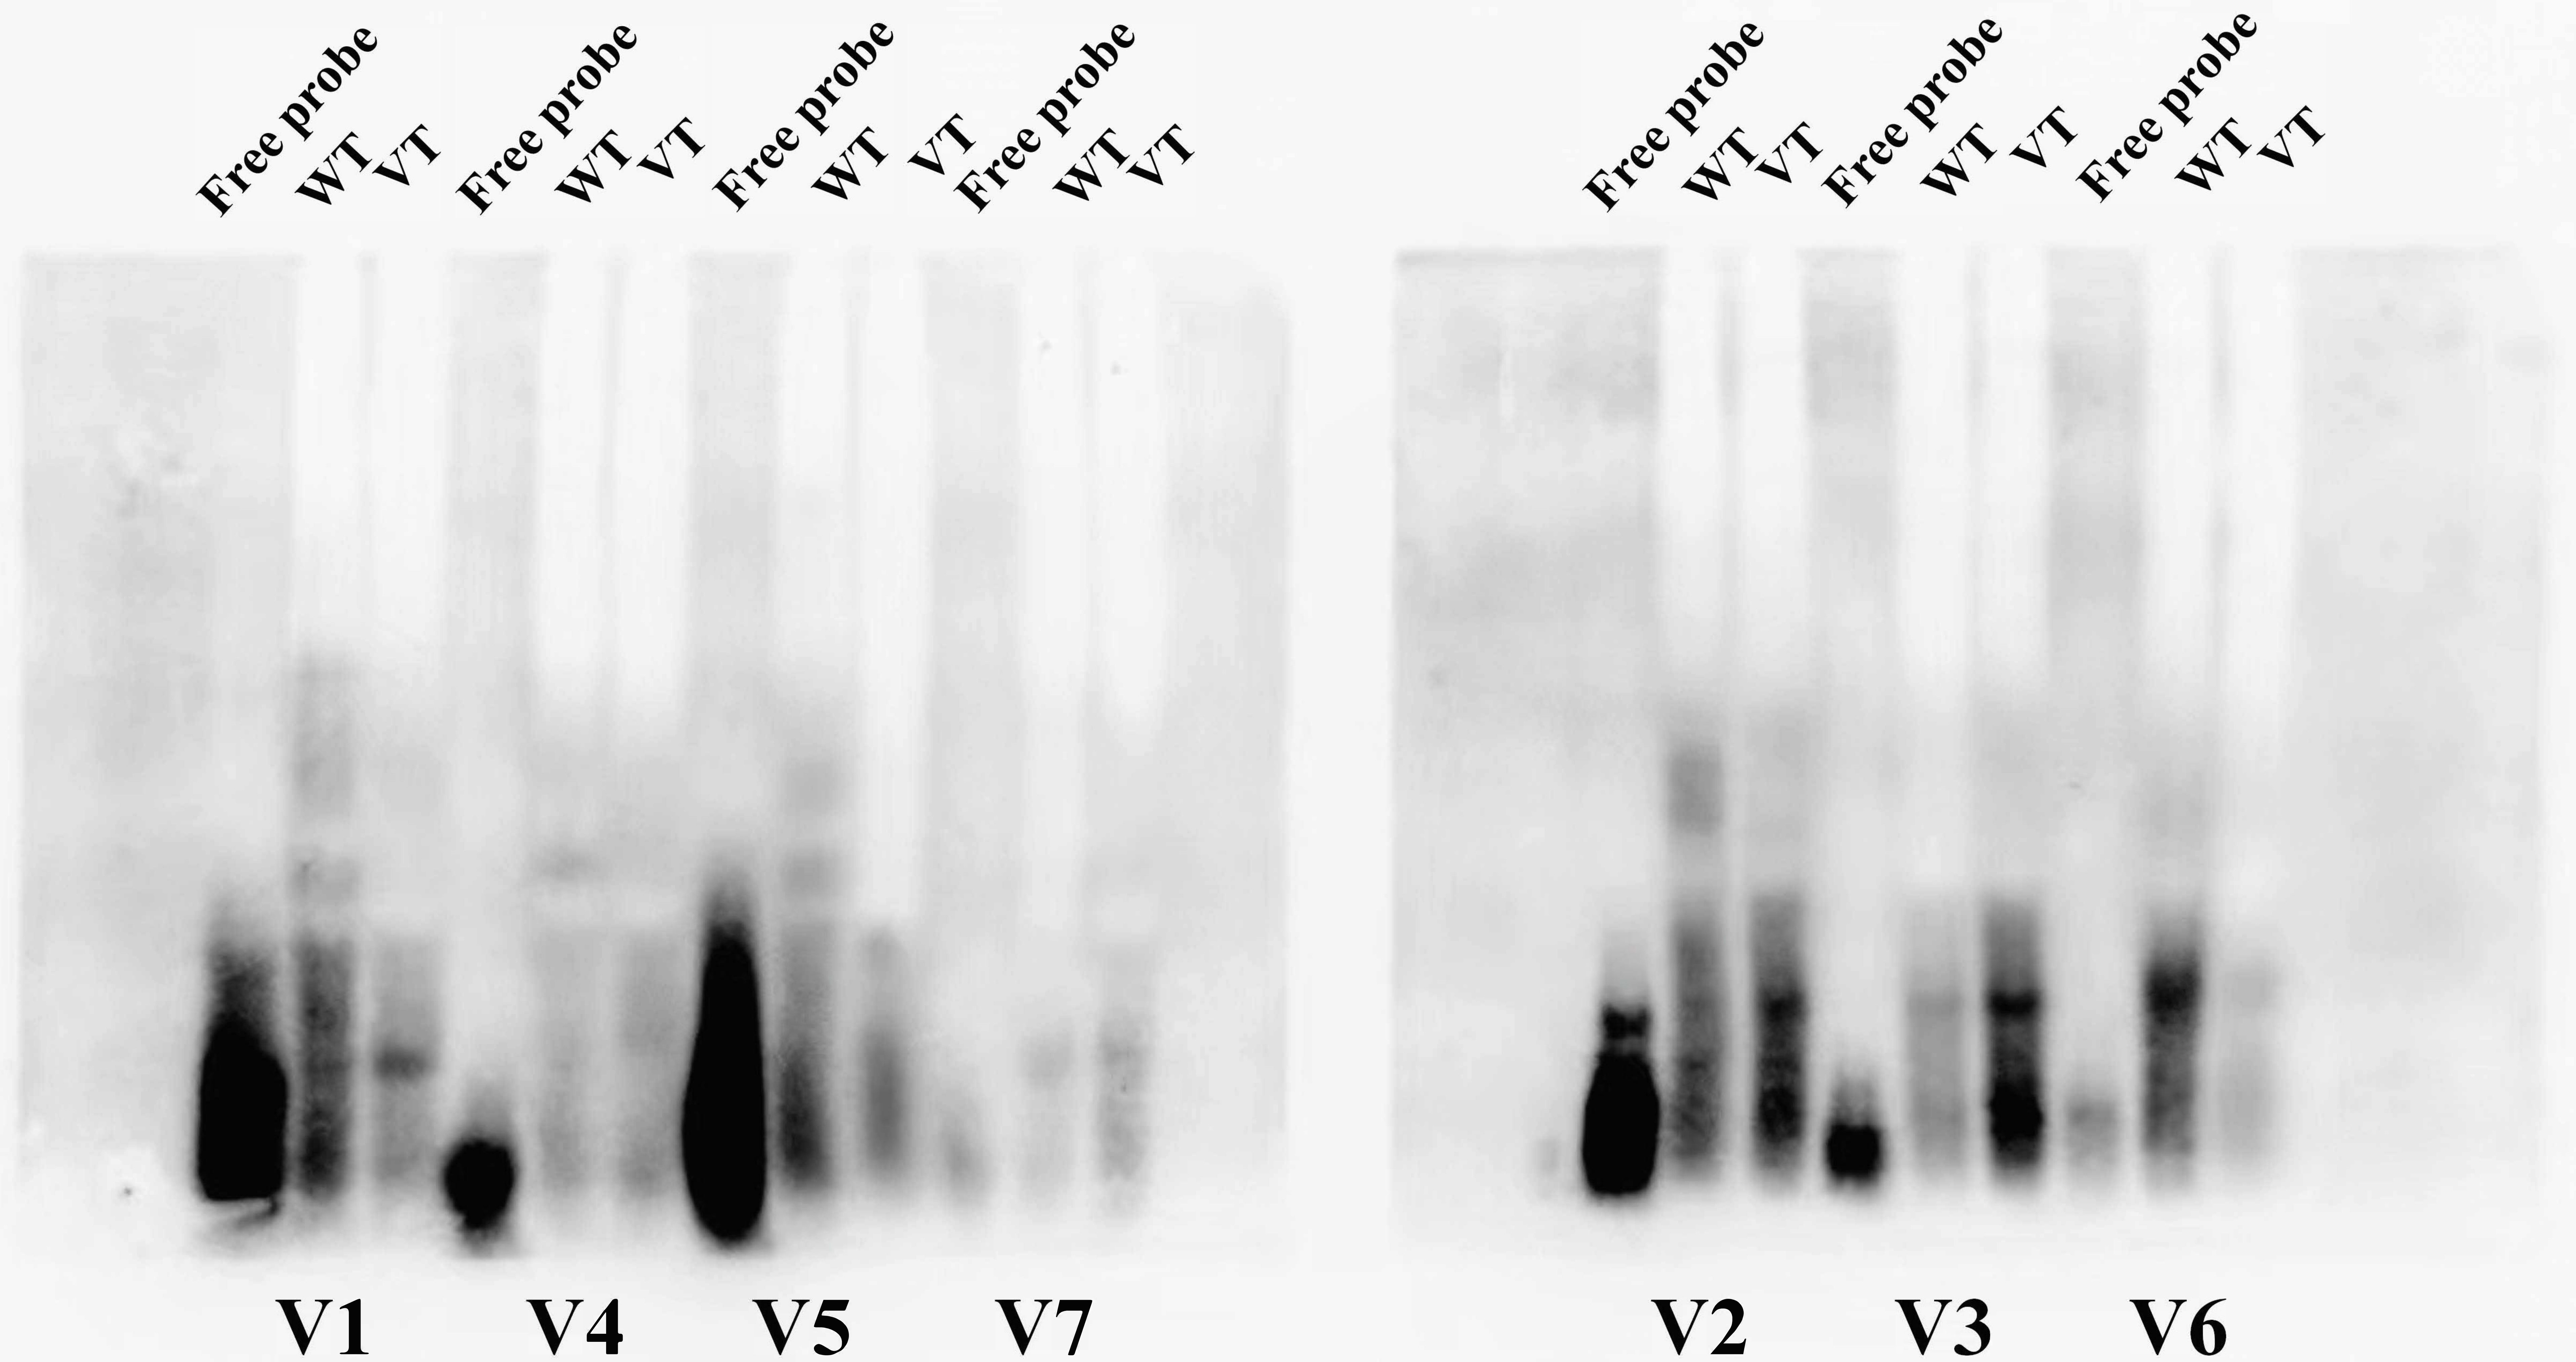



**Figure S2 DNAMAN comparison results for variant rs983891177**

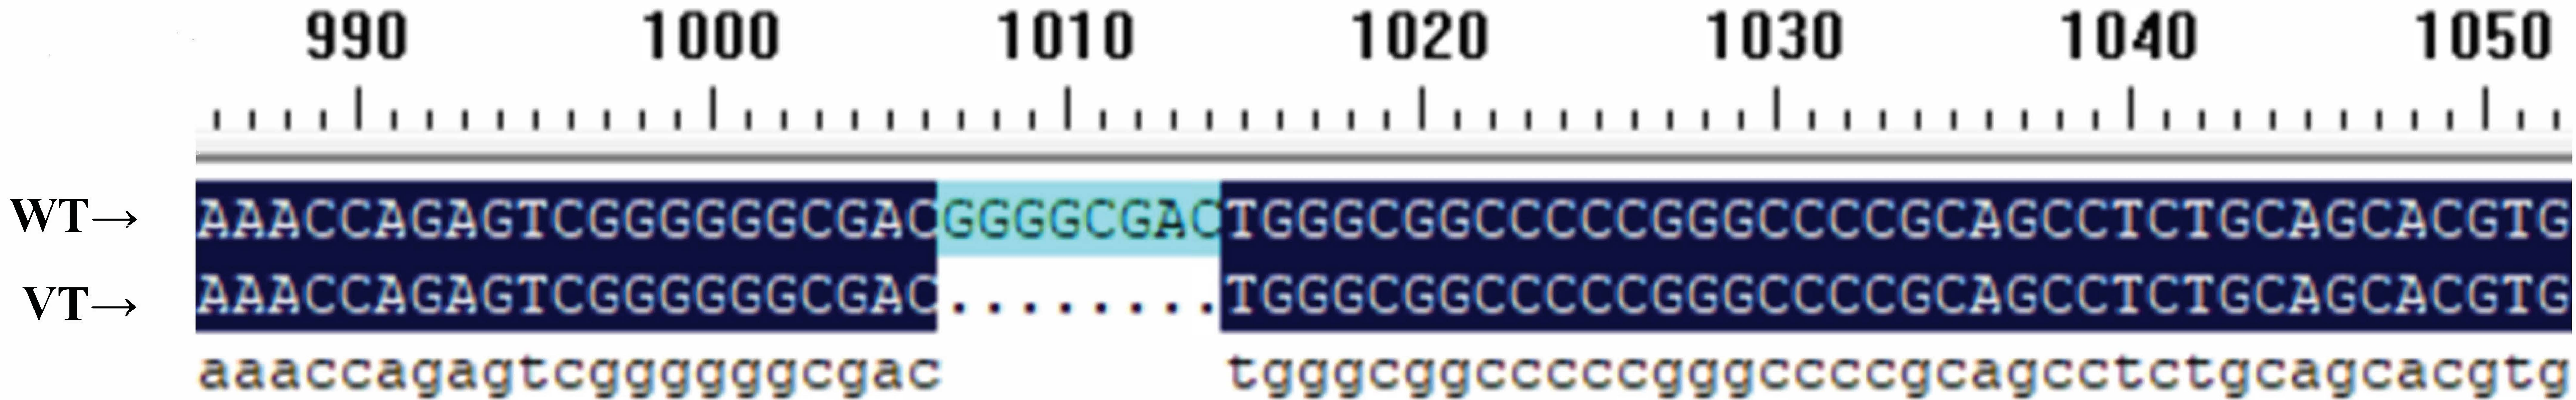



Table S1 Primers used in this study.

| Primers                                                               | Sequences 5'-3'                                           | Location | Position |
|-----------------------------------------------------------------------|-----------------------------------------------------------|----------|----------|
| <b>PCR and sequencing primers</b>                                     |                                                           |          |          |
| CITED2-F1                                                             | 5'-AAAGGAAGAGTCCCAGCCGT-3'                                | 3804     | -1197    |
| CITED2-F2                                                             | 5'-TTTCTGCTCCGAAGACCGAG-3'                                | 5221     | 200      |
| <b>Primers containing restriction sites</b>                           |                                                           |          |          |
| CITED2-KpnIa,b                                                        | 5'-(KpnI)-GGGGTACCAAAGGAAGAGTCCCAGCCGT-3'<br>CCCAGCCGT-3' | 3804     | -1197    |
| CITED3-BglIIa,b                                                       | 5'-(BglII)-CAAGATCTTTTCTGCTCCGAAGACCGAG-3'<br>AGACCGAG-3' | 5221     | 200      |
| <b>The double-stranded biotinylated oligonucleotides for the EMSA</b> |                                                           |          |          |
| g.3949 C>T                                                            | 5'-GCAAGAGCAGCCTTACTCAG(C/T)CCTCAAATTTCTTAATTAC-3'        |          |          |
| g.4461 T>C                                                            | 5'-CAGGAAAGGGCGCAT(T/C)ATTTGTCCGGGTCTT-3'                 |          |          |
| g.4735 T>C                                                            | 5'-GGCAGGGGAGGATTT(T/C)CCCCCTGCCTCGG-3'                   |          |          |
| g.5059 G>A                                                            | 5'-GGGCAACGGAGGG(G/A)AAATAAAAGGGAACGGC-3'                 |          |          |
| g.4047_4048ins                                                        | 5'-CGTTTGTACACACCCCC( /C)ACCTCCCGGATCCAG-3'               |          |          |
| g.4330_4331insC                                                       | 5'-CCTCCCCGCCCCC( /C)AGCTCCTGTCCTTGAAA-3'                 |          |          |
|                                                                       | g.4808_4815delGGGGCGAC                                    |          | -        |
